# Supplementary material for: Structure−Activity Relationships of Cinnamate Ester Analogues as Potent Antiprotozoal Agents
Source: PubMed Central journal article supplement — ChemMedChem. 2019 Nov 12;15(1):68–78. doi: 10.1002/cmdc.201900544 (PMC7003929; doi:10.1002/cmdc.201900544), 2019-11-12
Supplement: CMDC-15-68-s001.pdf [file CMDC-15-68-s001.pdf]

## **Author Contributions**

T.S. Conceptualization:Lead; Project administration:Lead; Supervision:Lead; Writing - Review & Editing:Lead

F.B. Data curation:Lead; Investigation:Lead; Visualization:Lead; Writing - Original Draft:Lead

M.K. Data curation:Supporting; Investigation:Supporting; Writing - Review & Editing:Supporting

B.W. Conceptualization:Supporting; Supervision:Supporting; Writing - Review & Editing:Supporting
